# Supplementary material for: Rapid and ratiometric sensor for CAN (Ce4+) through metal assisted oxidation reaction-altered through bond energy transfer (TBET): development of low cost devices (TLC plate sticks)
Source: Royal Society of Chemistry journal article supplement (doi:10.1039/c4ra07396g), 2014-09-05
Supplement: c4ra07396g1.pdf [file c4ra07396g1.pdf]

## Supporting Information

### **Rapid and ratiometric sensor for CAN (Ce<sup>4+</sup>) through metal assisted oxidation reaction-altered Through Bond Energy Transfer (TBET): development of low cost devices (TLC plate sticks)**

**Shyamaprosad Goswami\*, Sima Paul and Abhishek Manna**

Department of Chemistry, Indian Institute of Engineering Science & Technology, Shibpur, (Formerly Bengal Engg. and Science University, Shibpur), Howrah-711103, West Bengal, India.

### CONTENTS

|                                                                            |      |
|----------------------------------------------------------------------------|------|
| 1. Detection of Quantum yield.....                                         | 1    |
| 2. Calculation of the detection limit.....                                 | 2    |
| 3. Calculation of rate constant.....                                       | 3    |
| 4. pH effect on RCH moiety.....                                            | 3    |
| 5. <sup>1</sup> H-NMR, <sup>13</sup> C-NMR and Mass spectra.....           | 3-5  |
| 6. UV- <i>vis</i> spectra of receptor with different oxidizing agents..... | 6-8  |
| 7. Fluorescence spectra of receptor with different oxidizing agents.....   | 8-10 |
| 8. References.....                                                         | 10   |

## 1. Determination of fluorescence quantum yield:

Here, the quantum yield  $\phi$  was measured by using the following equation,

$$\phi_x = \phi_s \left( \frac{F_x}{F_s} \right) \left( \frac{A_s}{A_x} \right) \left( \frac{n_x^2}{n_s^2} \right)$$

Where,

X & S indicate the unknown and standard solution respectively,  $\phi$  = quantum yield,

F = area under the emission curve, A = absorbance at the excitation wave length,

n = index of refraction of the solvent. Here  $\phi$  measurements were performed using quinine sulfate in ethanol as standard [ $\phi = 0.546$ ] (error ~ 10%).

The quantum yield of **RCH** itself is 0.004 which is remarkably changed into 0.26, an enhancement around 65 fold is observed.

## 2. Calculation of the detection limit:

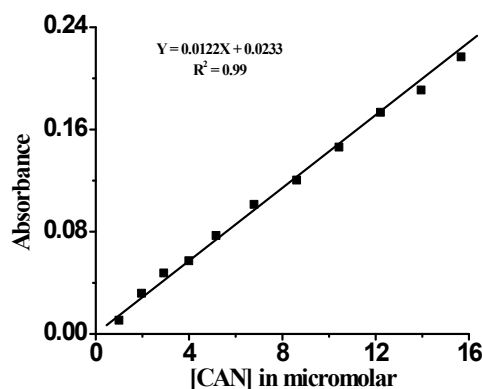

**Figure S1:** Absorbance change of RCH upon gradual addition of CAN.

The detection limit DL of **RCH** for CAN was determined from the following equation<sup>1</sup>:

$$DL = K * S_{b1} / S$$

Where K = 2 or 3 (we take 2 in this case);  $S_{b1}$  is the standard deviation of the blank solution; S is the slope of the calibration curve.

From the graph we get slope = 0.0242, and  $S_{b1}$  value is 0.008292.

Thus using the formula we get the Detection Limit = 0.685  $\mu$ M i.e. RCH can detect CAN in this minimum concentration.

### 3. Calculation of rate constant:

From the time vs. Fl. Intensity vs. time (sec.) plot at fixed wavelength (413nm) using first order rate equation (Figure S5), we get rate constant  $K = \text{slope} \times 2.303 = 0.0495 \times 2.303 = 11.39 \times 10^{-2} \text{ s}^{-1}$ ,

### 4. pH effect on RCH moiety:

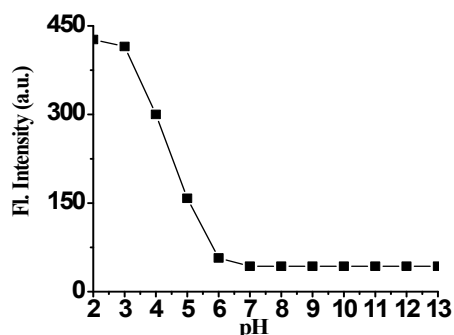

**Figure S5:** The change of fluorescence intensity of the receptor i.e. RCH ( $c = 2 \times 10^{-5} \text{ M}$ ) (at 585 nm) with pH.

### 5. NMR and HRMS spectra of RCH and the corresponding CAN adduct:

#### $^1\text{H}$ NMR spectrum of Receptor i.e. RCH:

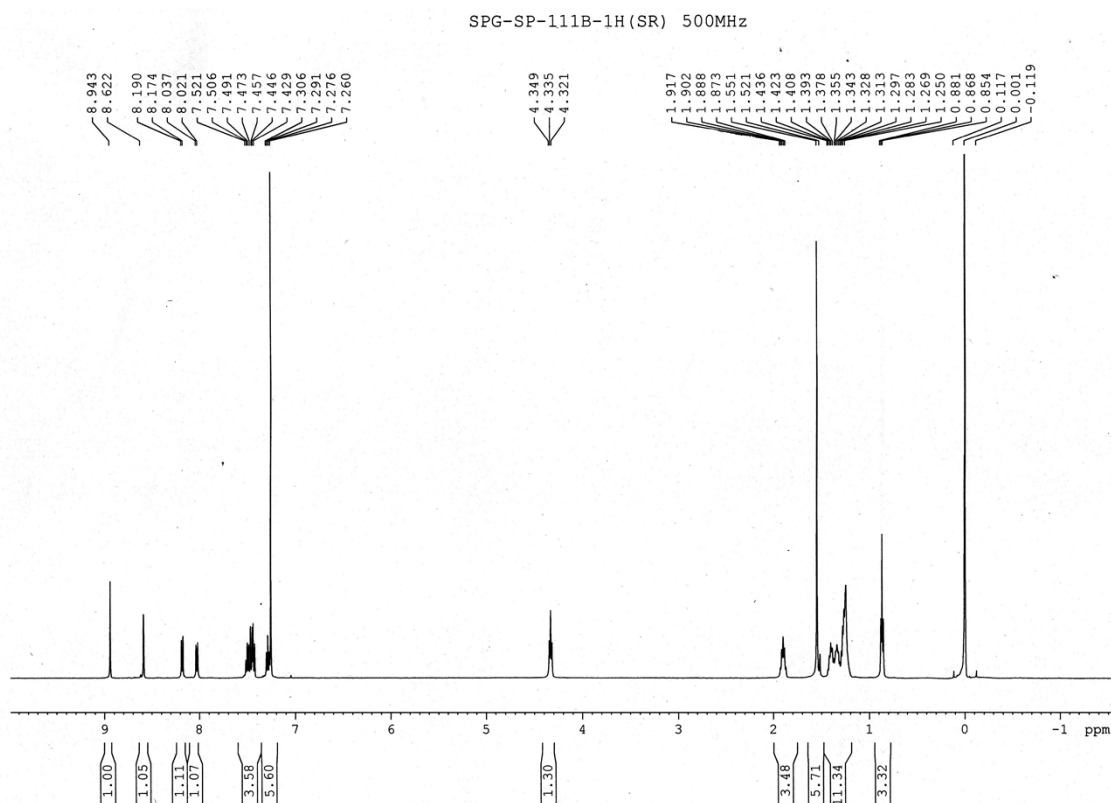

### <sup>13</sup>C NMR spectrum of RCH:

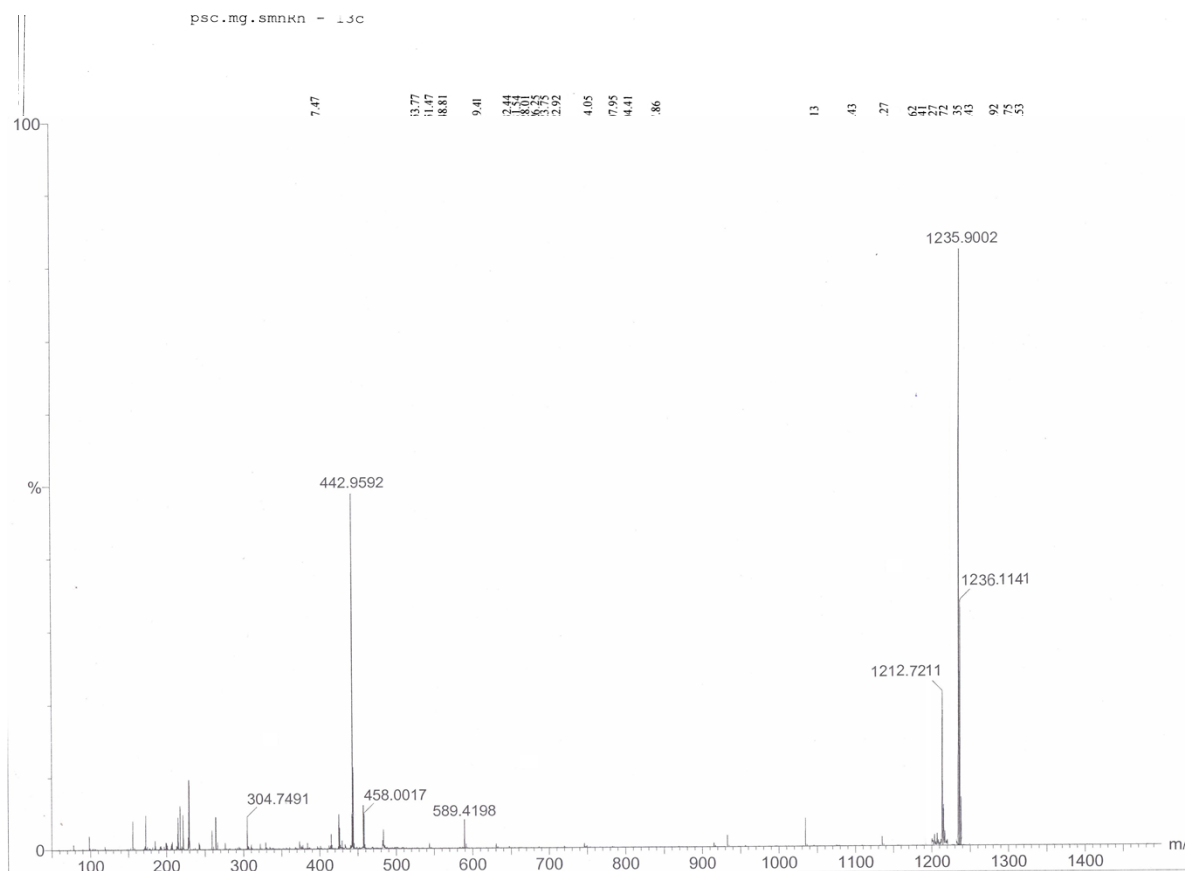

### HR MS Mass Spectra of RCH:

### <sup>1</sup>H NMR spectrum of CAN adduct:

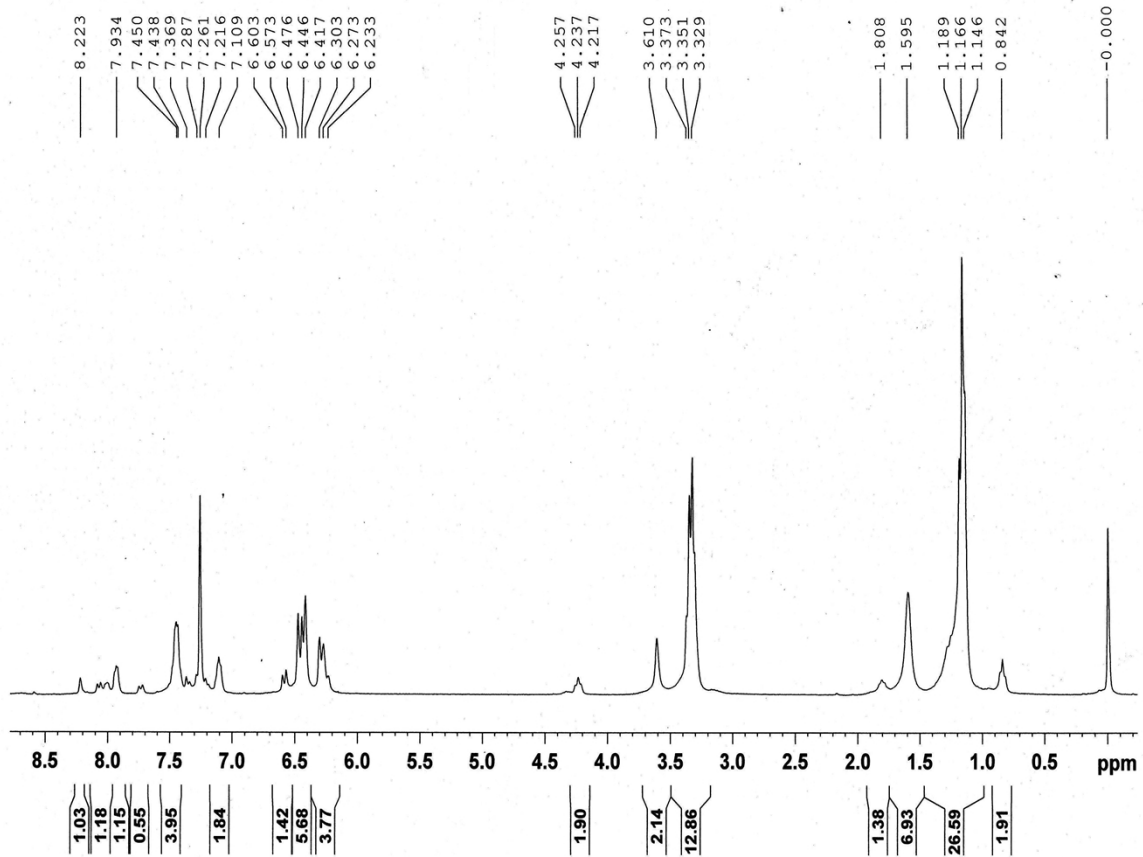

**HR MS Spectra of CAN adduct :**

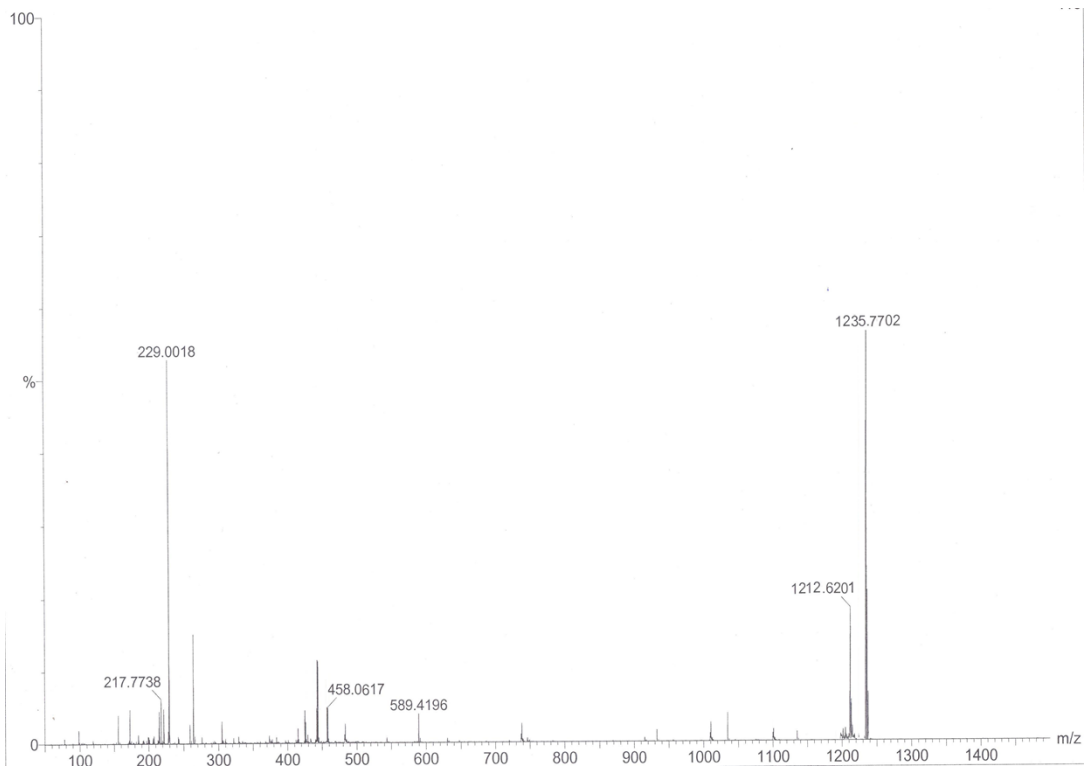

6. UV-vis absorption spectra of RCH with different oxidizing agents  $\text{Co}^{2+}$ ,  $\text{Hg}^{2+}$ ,  $\text{Fe}^{3+}$ ,  $\Gamma$ , IBX,  $\text{NO}_3^-$ ,  $\text{NO}_2^-$ ,  $\text{O}_2^-$ ,  $\text{OH}^-$ ,  $\text{OCl}^-$ ,  $\text{PO}_4^{3-}$ ,  $\text{SO}_4^{2-}$ ,  $\text{SO}_3^{2-}$ ,  $\text{CH}_3\text{CO}_3\text{H}$ . The solutions of anions and oxidants were prepared from  $\text{FeCl}_3$ ,  $\text{Co}(\text{ClO}_4)_2 \cdot 6\text{H}_2\text{O}$ ,  $\text{HgCl}_2$ ,  $\text{KI}$ ,  $\text{NaNO}_2$ ,  $\text{NaNO}_3$ ,  $\text{Na}_3\text{PO}_4$ ,  $\text{Na}_2\text{SO}_3$ ,  $\text{Na}_2\text{SO}_4$  in  $\text{CH}_3\text{CN-H}_2\text{O}$

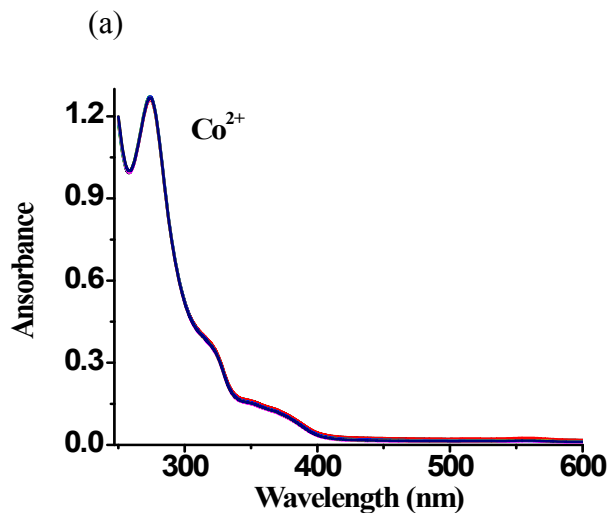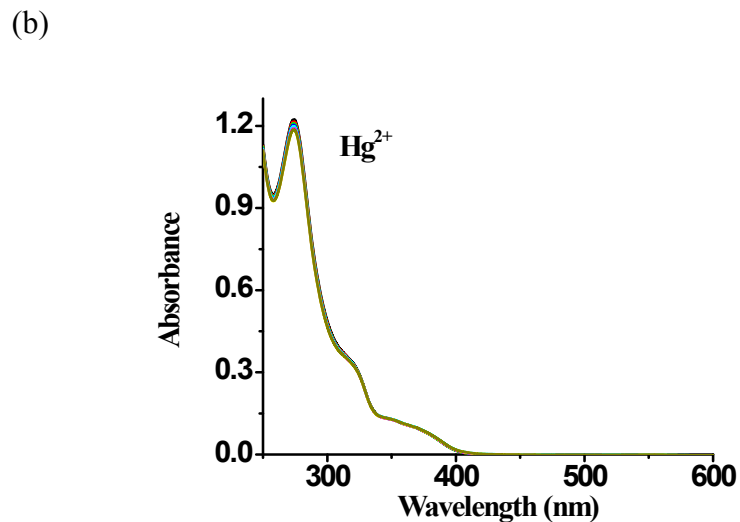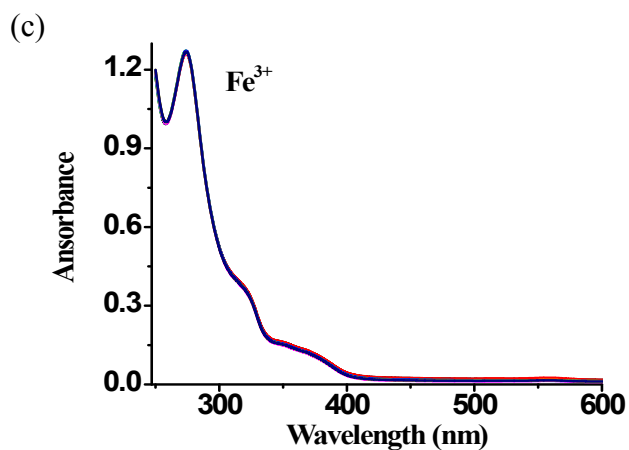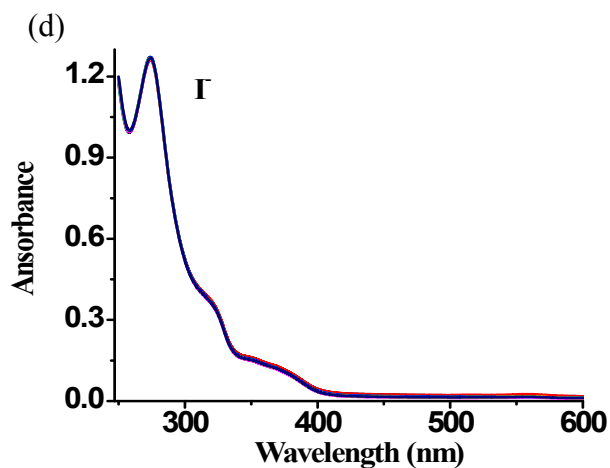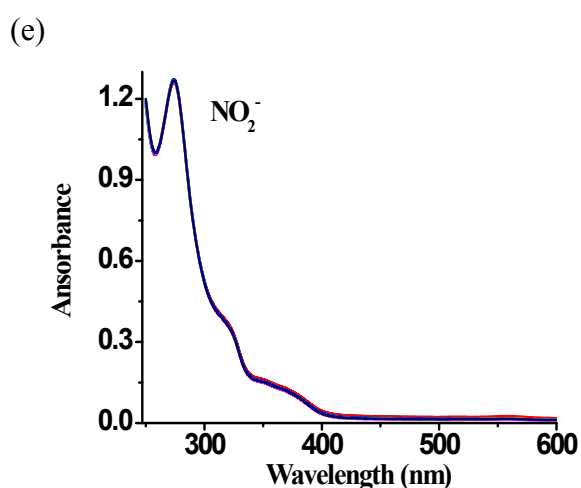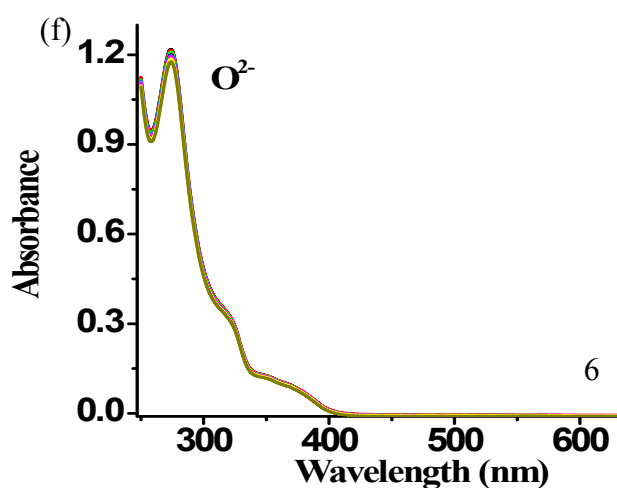

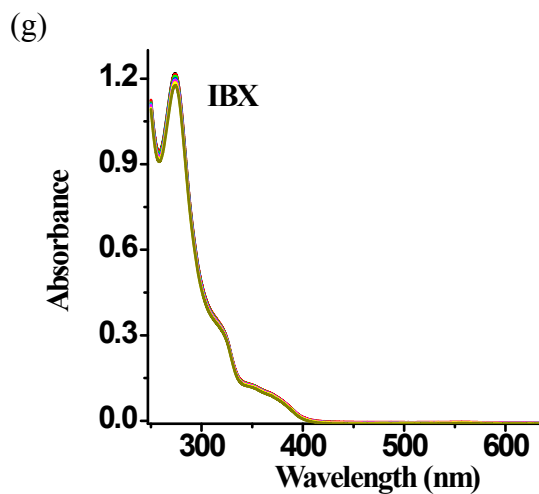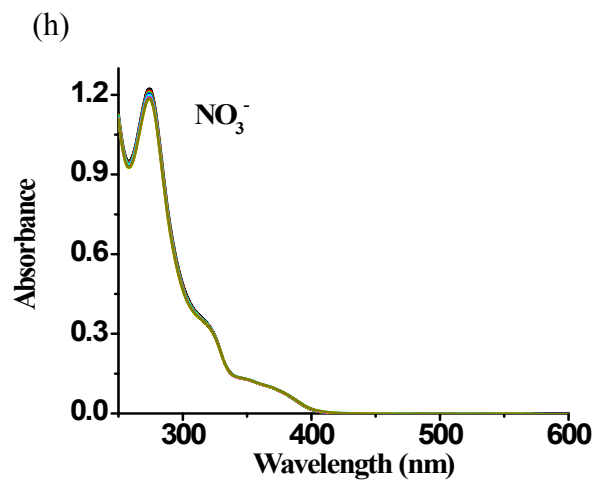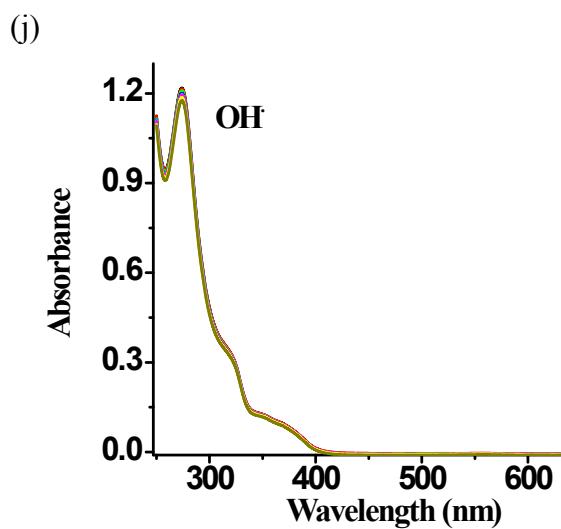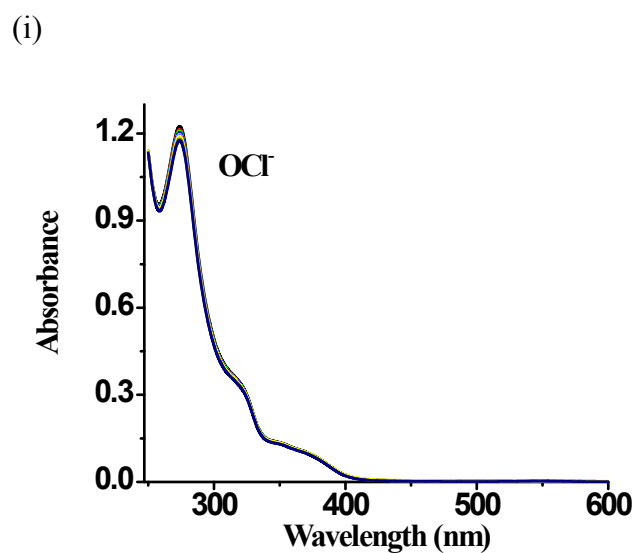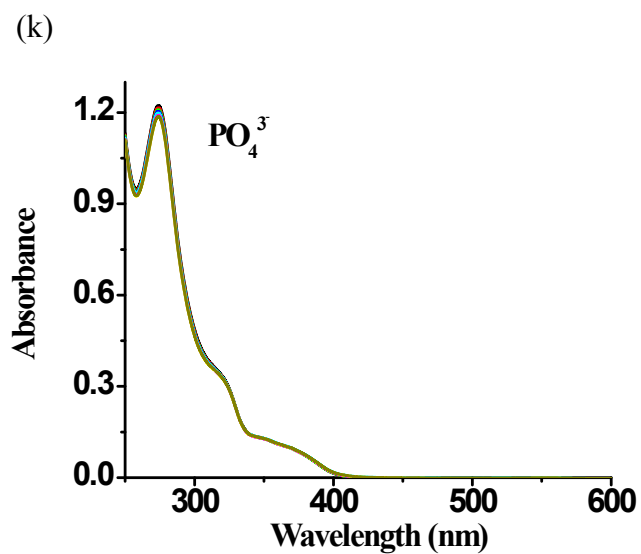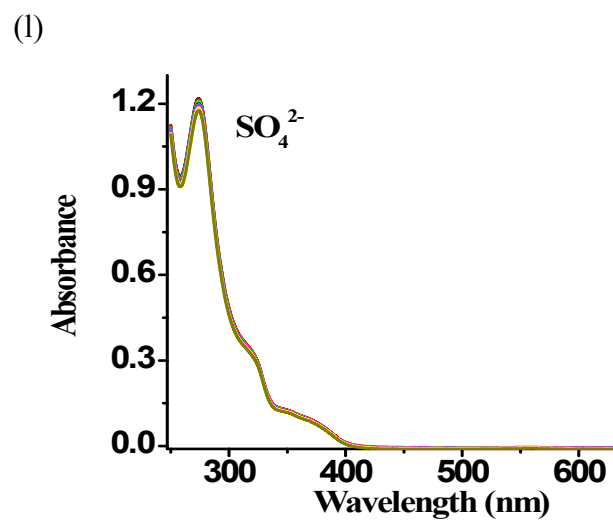

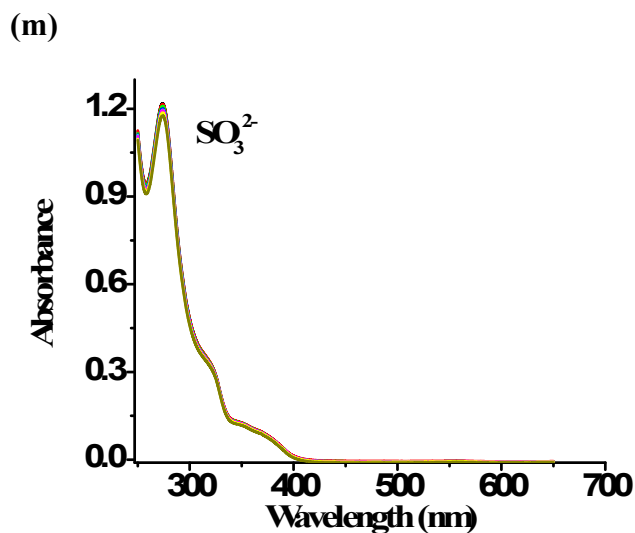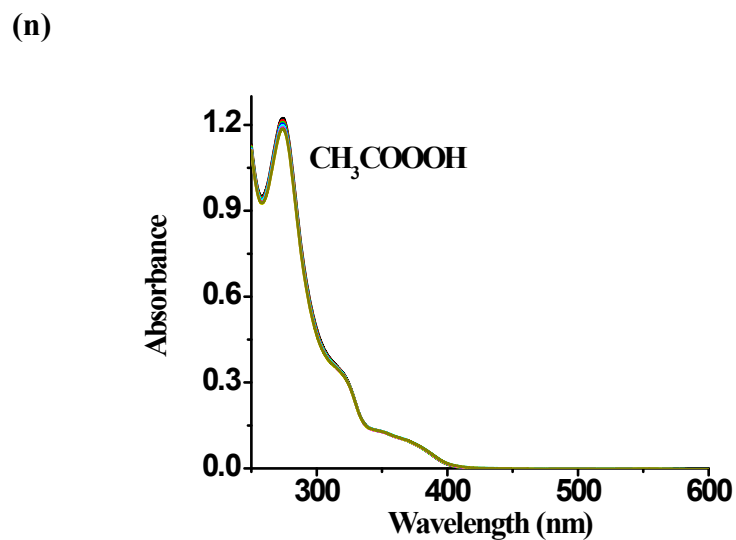

7. Fluorescence emission spectra of RCH with different oxidizing agents Co<sup>2+</sup>, Hg<sup>2+</sup>, Fe<sup>3+</sup>, I<sup>-</sup>, IBX, NO<sub>3</sub><sup>-</sup>, NO<sub>2</sub><sup>-</sup>, O<sub>2</sub><sup>-</sup>, OH<sup>-</sup>, OCl<sup>-</sup>, PO<sub>4</sub><sup>3-</sup>, SO<sub>4</sub><sup>2-</sup>, SO<sub>3</sub><sup>2-</sup>, CH<sub>3</sub>CO<sub>3</sub>H. The solutions of anions and oxidants were prepared from FeCl<sub>3</sub>, Co(ClO<sub>4</sub>)<sub>2</sub>·6H<sub>2</sub>O, HgCl<sub>2</sub>, KI, NaNO<sub>2</sub>, NaNO<sub>3</sub>, Na<sub>3</sub>PO<sub>4</sub>, Na<sub>2</sub>SO<sub>3</sub>, Na<sub>2</sub>SO<sub>4</sub> in CH<sub>3</sub>CN-H<sub>2</sub>O

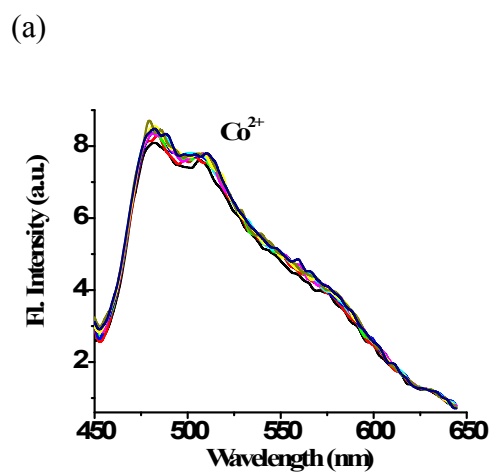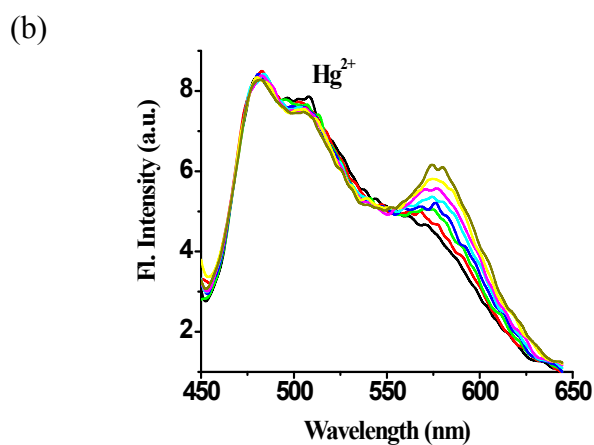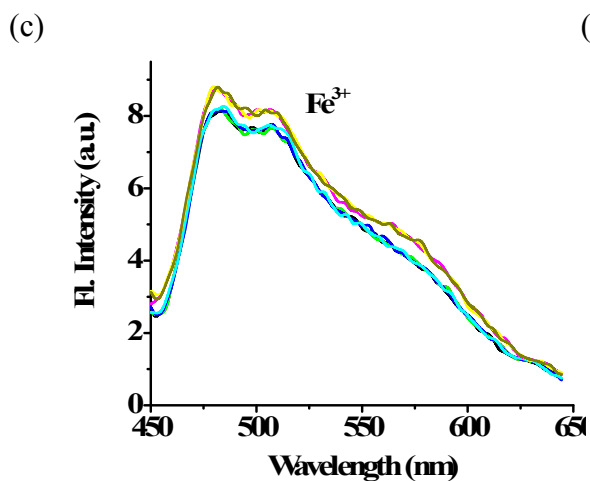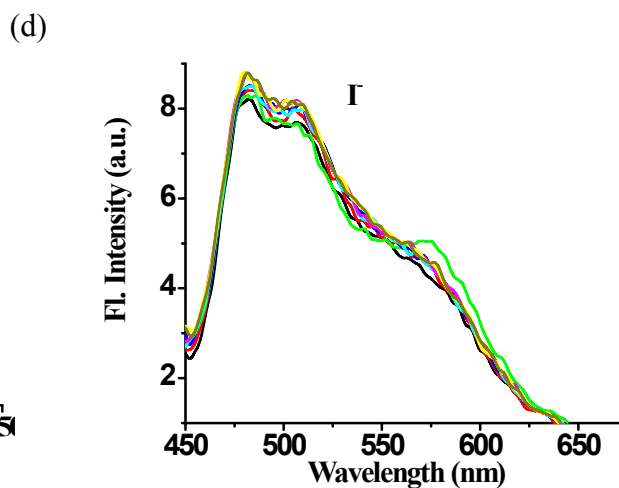



(e)

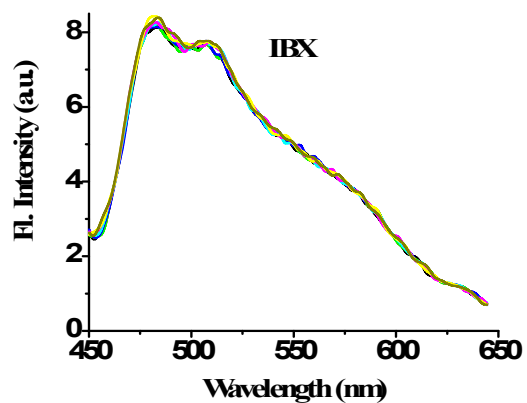

(f)

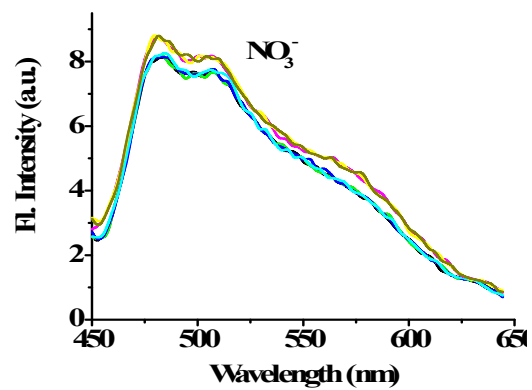

(g)

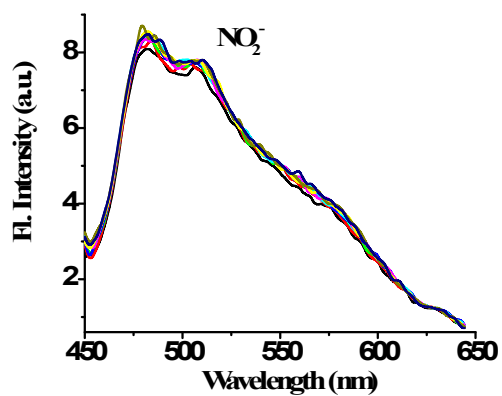

(h)

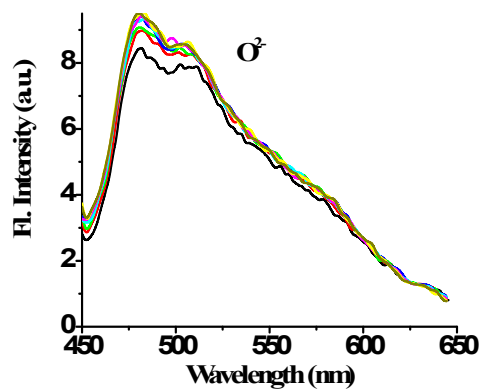

(i)

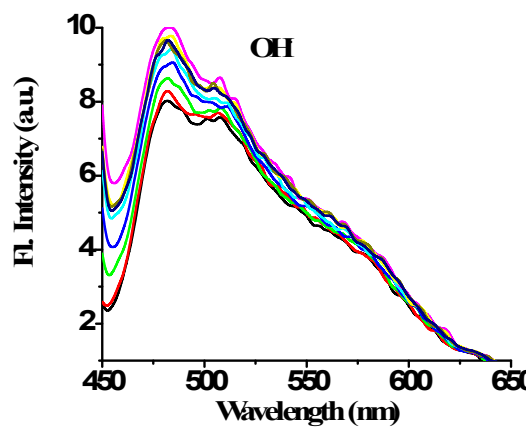

(j)

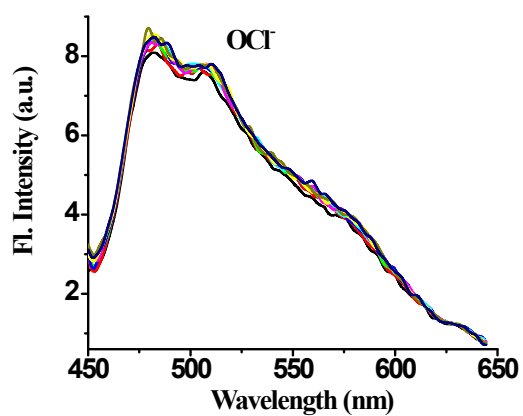

(k)

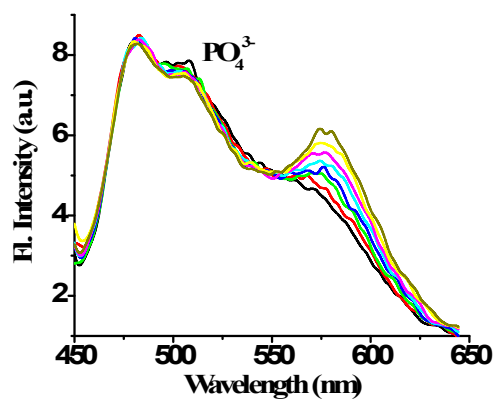

(l)

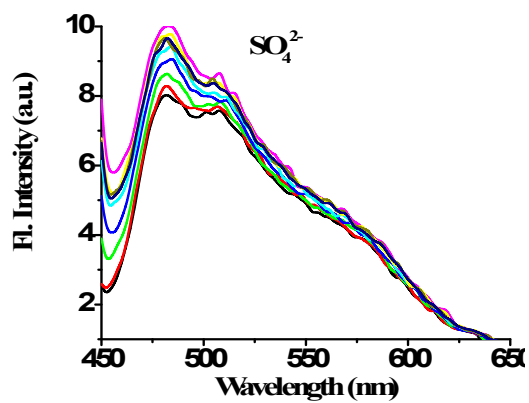

(m)

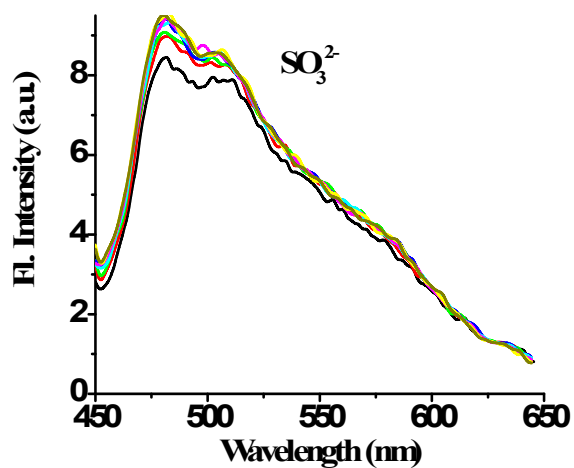

(n)

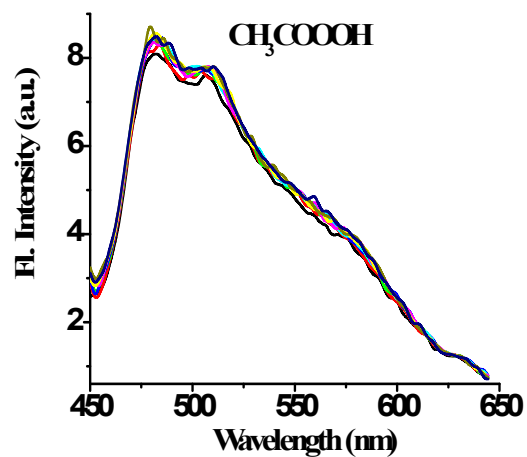

## 8. References :

1. M. Zhu, M. Yuan, X. Liu, J. Xu, J. Lv, C. Huang, H. Liu, Y. Li, S. Wang, D. Zhu, *Org. Lett.* 2008, **10**, 1481-1484
